# Supplementary material for: Remarks on catalytic reduction of CO2, H+ and H2 by monovalent Ni
Source: Royal Society of Chemistry journal article supplement (doi:10.1039/b516113d), 2006-01-01
Supplement: b516113d.pdf [file b516113d.pdf]

## Electronic Supporting Information

Remarks on Catalytic Reduction of CO<sub>2</sub>, H<sup>+</sup> and H<sub>2</sub> by Monovalent Ni

Wojciech Grochala

- 
- S1. Calculated molecular properties of compounds of Ni(I).**
  - S2. Calculated molecular properties of compounds of Ni(II).**
  - S3. Calculated molecular properties of compounds of Ni(III).**
  - S4. Calculated molecular properties of dihydrogen complexes.**
  - S5. Calculated molecular properties of hydroxy complexes of Ni(III).**
  - S6. Calculated molecular properties of OH<sup>-</sup>, H<sub>2</sub>O, H<sub>3</sub>O<sup>+</sup>, H<sub>2</sub> and CO<sub>2</sub>.**
  - S7. Transformations of various hydroxy- complexes of Ni(I) at different deprotonation stages.**
- 

Our DFT computations (Gaussian 03 package) have been performed with the B3LYP correlation-exchange functional. We have used the Pople's basis set (6-311++G\*\* for C, H, O and N, and 6-31G\*\* for Ni). All minima have been tested for harmonic frequencies, while yielding no imaginary values. Since the species containing Ni(II) can exhibit spin crossover phenomenon, we have considered both singlet and triplet states in our calculations. The reaction enthalpies (calculated at T=0 K) are not corrected for zero-point vibrational energies; these corrections are typically small (up to 0.05 eV) and usually promote reaction substrates due to large zero-point energies for the H-H oscillator.

Properties of cyclam complexes of Ni are dependent on the basicity/acidity of the environment. In order to mimic the varying pH, we have studied Ni-cyclam complexes bearing various charges. For example, Ni(I)[N<sub>4</sub>14]<sup>1+</sup> serves as a model species in a relatively acidic environment. When a strong base, H<sup>-</sup>, is attached to it, or when one or two protons are dissociated from the amine nitrogens, much more basic species are formed: (Ni(I)(H<sup>-</sup>)[N<sub>4</sub>14]<sup>0</sup>, Ni(I)[N<sub>4</sub>14-H<sup>+</sup>]<sup>0</sup>, Ni(I)[N<sub>4</sub>14-2H<sup>+</sup>]<sup>-1</sup>). It turns out that they may have different redox chemistry than the parent species, Ni(I)[N<sub>4</sub>14]<sup>1+</sup>.

## S1. Calculated molecular properties of compounds of Ni(I).

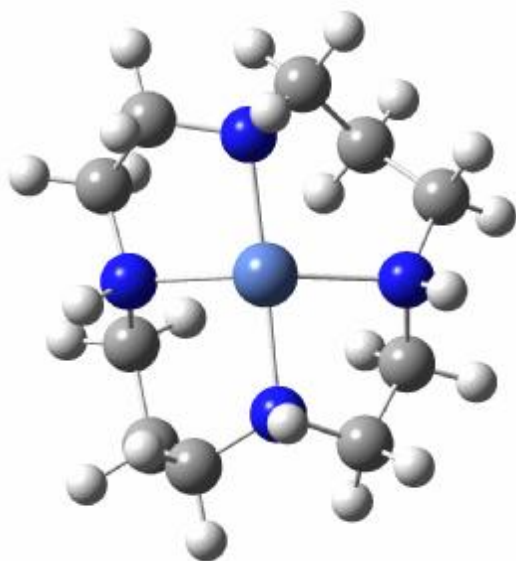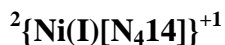

$$E = -2122.70791 \text{ au}$$

$$\mu_{\text{dip}} = 0.57 \text{ D}$$

$$R(\text{Ni-N}) = 2.054, 2.056, 2.094, 2.098 \text{ \AA}$$

$$q(\text{Ni}) = -1.164 \text{ e}$$

$$q(\text{N}) = +0.133, +0.050, -0.004, -0.021 \text{ e}$$

$$E_{\text{SOMO},\alpha} = -0.276 \text{ au}$$

$$E_{\text{SOMO-1},\alpha} = -0.299 \text{ au}, E_{\text{SOMO-1},\beta} = -0.265 \text{ au}$$

$$E_{\text{SOMO+1},\alpha} = -0.131 \text{ au}, E_{\text{SOMO+1},\beta} = -0.130 \text{ au}$$

$$\Delta_{\text{min}} = 0.011 \text{ au}$$

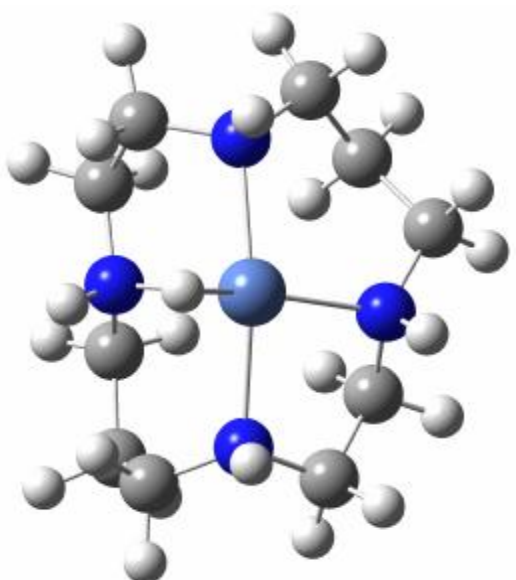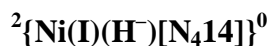

$$E = -2123.40992 \text{ au}$$

$$\mu_{\text{dip}} = 5.80 \text{ D}$$

$$R(\text{Ni-N}) = 2.125, 2.184, 2.204, 2.459 \text{ \AA}$$

$$R(\text{Ni-H}) = 1.605 \text{ \AA}$$

$$q(\text{Ni}) = -0.310 \text{ e}$$

$$q(\text{H}_{\text{Ni}}) = -0.409 \text{ e}$$

$$q(\text{N}) = -0.049, -0.111, -0.226, -0.247 \text{ e}$$

$$E_{\text{SOMO},\alpha} = -0.100 \text{ au}$$

$$E_{\text{SOMO-1},\alpha} = -0.133 \text{ au}, E_{\text{SOMO-1},\beta} = -0.080 \text{ au}$$

$$E_{\text{SOMO+1},\alpha} = -0.019 \text{ au}, E_{\text{SOMO+1},\beta} = -0.018 \text{ au}$$

$$\Delta_{\text{min}} = 0.020 \text{ au}$$

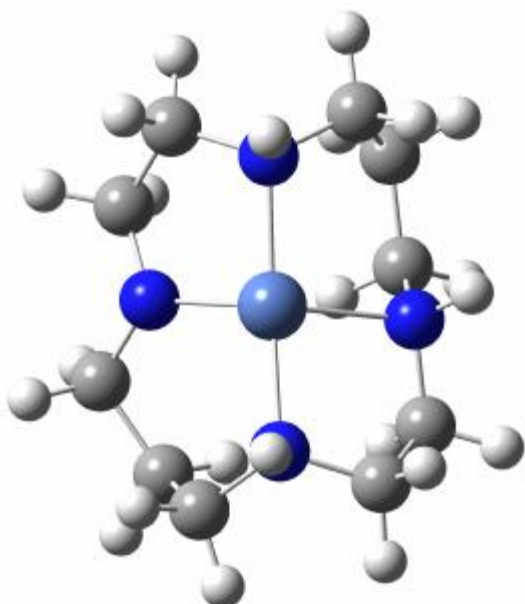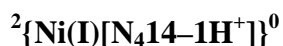

$$E = -2122.22824 \text{ au}$$

$$\mu_{\text{dip}} = 4.95 \text{ D}$$

$$R(\text{Ni-N}) = 1.922, 2.046, 2.054, 2.115 \text{ \AA}$$

$$q(\text{Ni}) = -2.071 \text{ e}$$

$$q(\text{N}) = +0.197, +0.200, +0.216, +0.280 \text{ e}$$

$$E_{\text{SOMO},\alpha} = -0.111 \text{ au}$$

$$E_{\text{SOMO-1},\alpha} = -0.129 \text{ au}, E_{\text{SOMO-1},\beta} = -0.087 \text{ au}$$

$$E_{\text{SOMO+1},\alpha} = -0.024 \text{ au}, E_{\text{SOMO+1},\beta} = -0.023 \text{ au}$$

$$\Delta_{\text{min}} = 0.018 \text{ au}$$

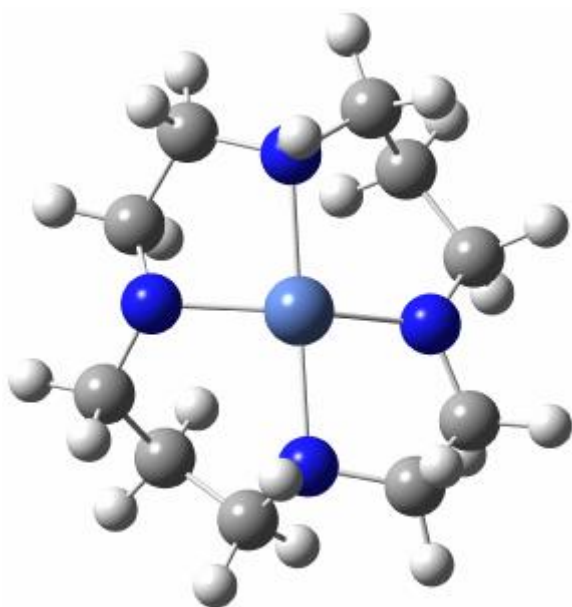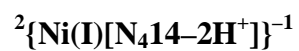

**E = -2121.64266 au**

$\mu_{\text{dip}} = 0.53 \text{ D}$

$R(\text{Ni-N}) = 1.943, 1.999, 2.129, 2.129 \text{ \AA}$

$q(\text{Ni}) = -1.127 \text{ e}$

$q(\text{N}) = +0.091, +0.077, -0.042, -0.089 \text{ e}$

$E_{\text{SOMO},\alpha} = +0.026 \text{ au (positive!)}$

$E_{\text{SOMO-1},\alpha} = +0.016 \text{ au}, E_{\text{SOMO-1},\beta} = +0.042 \text{ au}$

$E_{\text{SOMO+1},\alpha} = +0.082 \text{ au}, E_{\text{SOMO+1},\beta} = +0.083 \text{ au}$

$\Delta_{\text{min}} = 0.010 \text{ au}$

## S2. Calculated molecular properties of compounds of Ni(II).

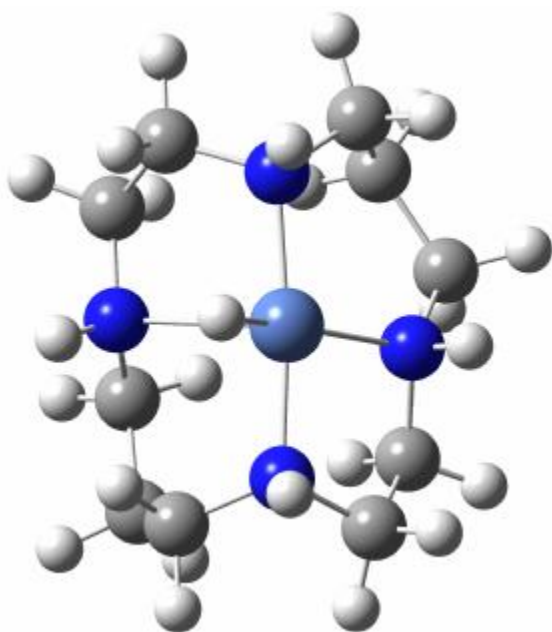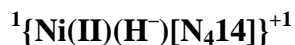

$$E = -2123.28086 \text{ au}$$

$$\mu_{\text{dip}} = 2.02 \text{ D}$$

$$R(\text{Ni-N}) = 1.944, 1.945, 2.046, 2.467 \text{ \AA}$$

$$R(\text{Ni-H}) = 1.472 \text{ \AA}$$

$$q(\text{Ni}) = -0.906 \text{ e}$$

$$q(\text{H}_{\text{Ni}}) = -0.092 \text{ e}$$

$$q(\text{N}) = +0.036, +0.011, -0.011, -0.134 \text{ e}$$

$$E_{\text{HOMO}} = -0.293 \text{ au}$$

$$E_{\text{LUMO}} = -0.147 \text{ au}$$

$$\Delta_{\text{HL}} = 0.146 \text{ au}$$

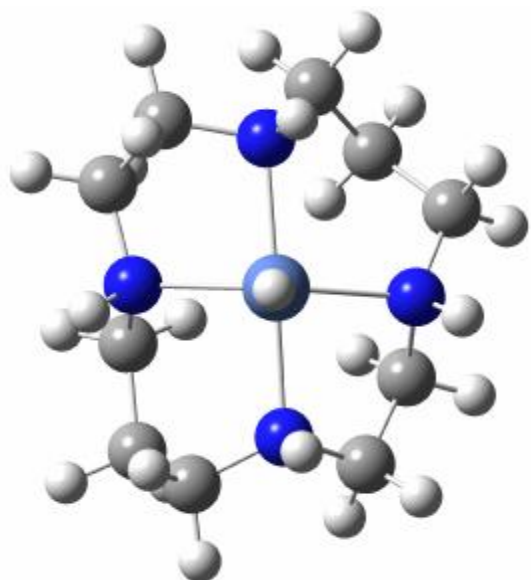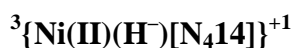

$$E = -2123.28739 \text{ au}$$

$$\mu_{\text{dip}} = 2.50 \text{ D}$$

$$R(\text{Ni-N}) = 2.119, 2.122, 2.133, 2.141 \text{ \AA}$$

$$R(\text{Ni-H}) = 1.574 \text{ \AA}$$

$$q(\text{Ni}) = -0.898 \text{ e}$$

$$q(\text{H}_{\text{Ni}}) = -0.152 \text{ e}$$

$$q(\text{N}) = +0.004, +0.025, +0.037, +0.040 \text{ e}$$

$$E_{\text{SOMO},\alpha} = -0.303 \text{ au}$$

$$E_{\text{SOMO}-1,\alpha} = -0.341 \text{ au}, E_{\text{SOMO}-1,\beta} = -0.353 \text{ au}$$

$$E_{\text{SOMO}+1,\alpha} = -0.126 \text{ au}, E_{\text{SOMO}+1,\beta} = -0.170 \text{ au}$$

$$\Delta_{\text{min}} = 0.037 \text{ au}$$

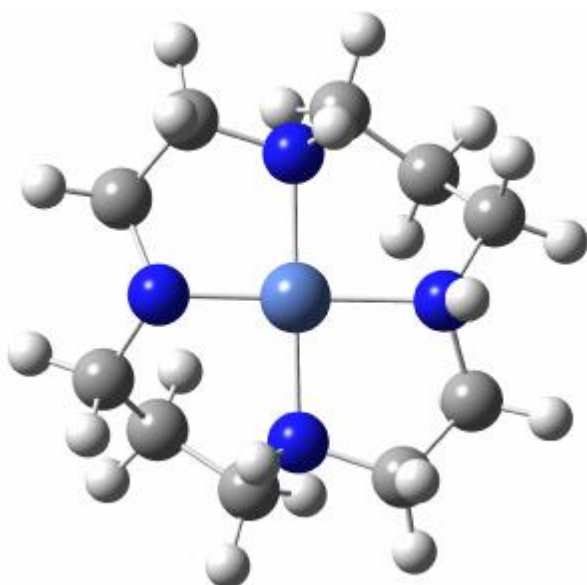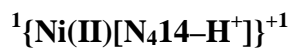

$$E = -2122.10660 \text{ au}$$

$$\mu_{\text{dip}} = 4.80 \text{ D}$$

$$R(\text{Ni-N}) = 1.839, 1.935, 1.938, 1.997 \text{ \AA}$$

$$q(\text{Ni}) = -0.836 \text{ e}$$

$$q(\text{N}) = +0.016, +0.008, -0.005, -0.149 \text{ e}$$

$$E_{\text{HOMO}} = -0.298 \text{ au}$$

$$E_{\text{LUMO}} = -0.156 \text{ au}$$

$$\Delta_{\text{HL}} = 0.146 \text{ au}$$

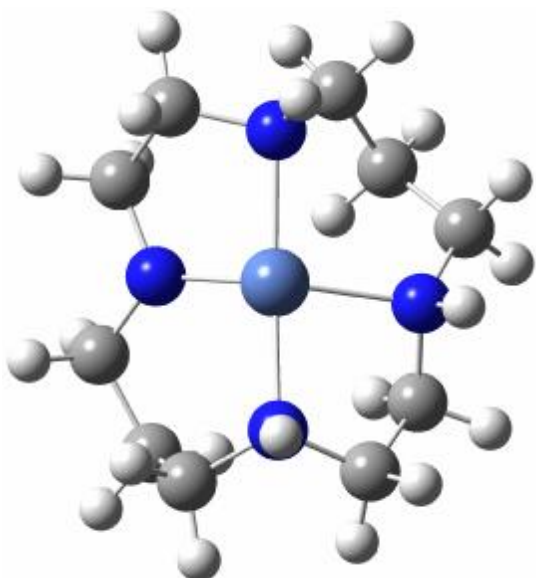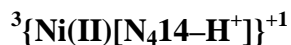

$$E = -2122.10229 \text{ au}$$

$$\mu_{\text{dip}} = 3.89 \text{ D}$$

$$R(\text{Ni-N}) = 2.085, 2.098, 2.100, 1.831 \text{ \AA}$$

$$q(\text{Ni}) = -0.623 \text{ e}$$

$$q(\text{N}) = -0.115, -0.085, -0.038, +0.051 \text{ e}$$

$$E_{\text{SOMO},\alpha} = -0.318 \text{ au}$$

$$E_{\text{SOMO-1},\alpha} = -0.329 \text{ au}, E_{\text{SOMO-1},\beta} = -0.323 \text{ au}$$

$$E_{\text{SOMO+1},\alpha} = -0.142 \text{ au}, E_{\text{SOMO+1},\beta} = -0.192 \text{ au}$$

$$\Delta_{\text{min}} = 0.005 \text{ au}$$

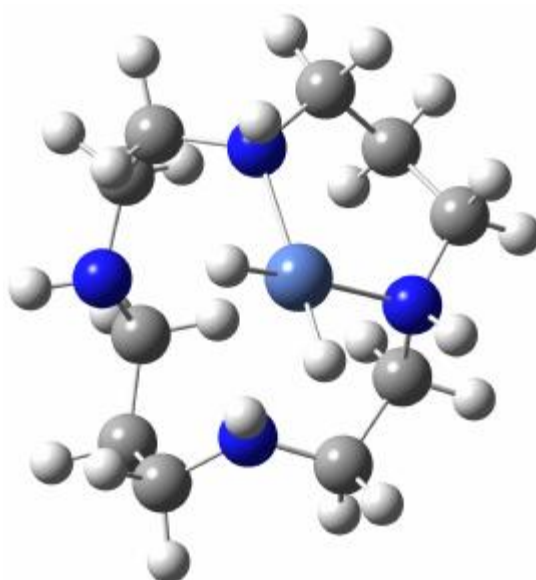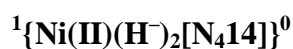

$$E = -2124.00743 \text{ au}$$

$$\mu_{\text{dip}} = 5.84 \text{ D}$$

$$R(\text{Ni-N}) = 2.022, 2.044, (2.771, 3.655) \text{ \AA}$$

$$R(\text{Ni-H}) = 1.464, 1.473 \text{ \AA}$$

$$q(\text{Ni}) = +0.096 \text{ e}$$

$$q(\text{H}_{\text{Ni}}) = -0.197, -0.204 \text{ e}$$

$$q(\text{N}) = -0.009, -0.067, -0.286, -0.287 \text{ e}$$

$$E_{\text{HOMO}} = -0.141 \text{ au}$$

$$E_{\text{LUMO}} = -0.018 \text{ au}$$

$$\Delta_{\text{HL}} = 0.123 \text{ au}$$

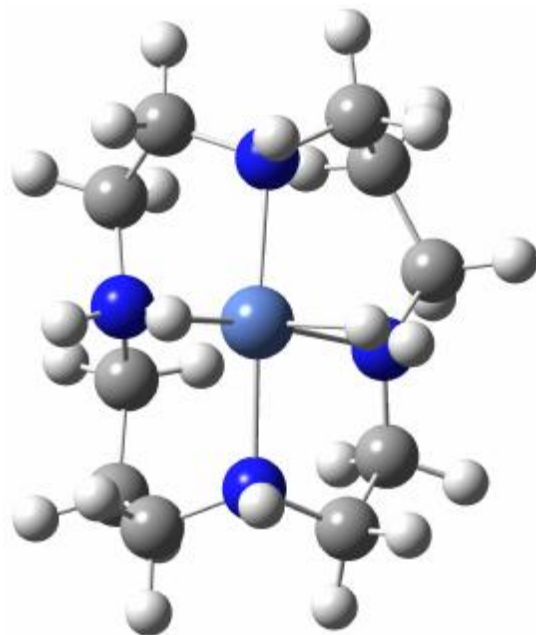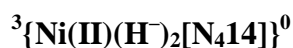

$$E = -2124.00328 \text{ au}$$

$$\mu_{\text{dip}} = 6.16 \text{ D}$$

$$R(\text{Ni-N}) = 2.152, 2.171, 2.262, 2.371 \text{ \AA}$$

$$R(\text{Ni-H}) = 1.636, 1.674 \text{ \AA}$$

$$q(\text{Ni}) = -0.456 \text{ e}$$

$$q(\text{H}_{\text{Ni}}) = -0.372, -0.391 \text{ e}$$

$$q(\text{N}) = +0.433, +0.267, +0.239, +0.221 \text{ e}$$

$$E_{\text{SOMO},\alpha} = -0.119 \text{ au}$$

$$E_{\text{SOMO-1},\alpha} = -0.161 \text{ au}, E_{\text{SOMO-1},\beta} = -0.187 \text{ au}$$

$$E_{\text{SOMO+1},\alpha} = -0.019 \text{ au}, E_{\text{SOMO+1},\beta} = -0.019 \text{ au}$$

$$\Delta_{\text{min}} = 0.042 \text{ au}$$

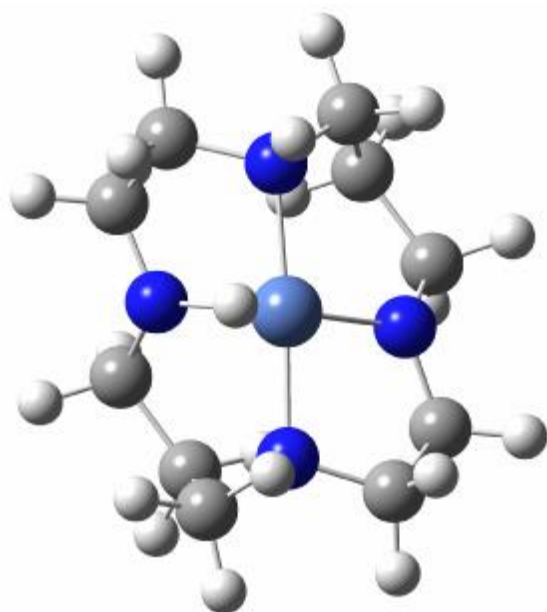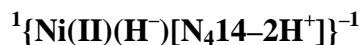

**E = -2122.21485 au**

$\mu_{\text{dip}} = 2.23 \text{ D}$

$R(\text{Ni-N}) = 1.935, 1.961, 1.975, 2.199 \text{ \AA}$

$R(\text{Ni-H}) = 1.539 \text{ \AA}$

$q(\text{Ni}) = -0.675 \text{ e}$

$q(\text{H}_{\text{Ni}}) = -0.405 \text{ e}$

$q(\text{N}) = -0.009, -0.030, -0.062, -0.119 \text{ e}$

$E_{\text{HOMO}} = +0.020 \text{ au}$  (positive!)

$E_{\text{LUMO}} = +0.081 \text{ au}$

$\Delta_{\text{HL}} = 0.061 \text{ au}$

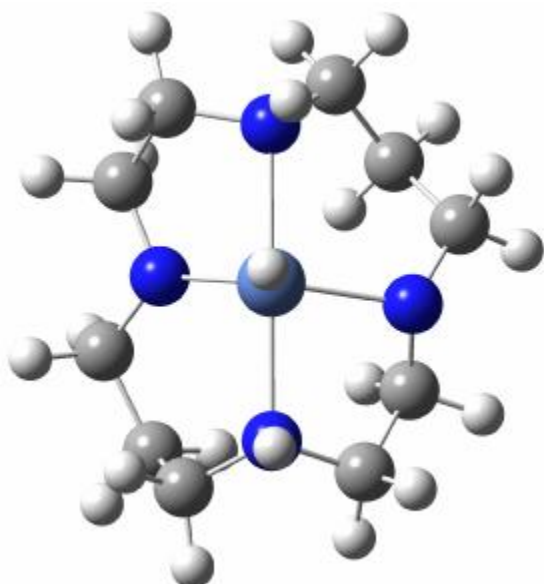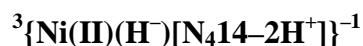

**E = -2122.24583 au**

$\mu_{\text{dip}} = 2.75 \text{ D}$

$R(\text{Ni-N}) = 1.985, 2.057, 2.187, 2.214 \text{ \AA}$

$R(\text{Ni-H}) = 1.650 \text{ \AA}$

$q(\text{Ni}) = -0.437 \text{ e}$

$q(\text{H}_{\text{Ni}}) = -0.633 \text{ e}$

$q(\text{N}) = +0.025, +0.015, +0.002, -0.005 \text{ e}$

$E_{\text{SOMO},\alpha} = -0.006 \text{ au}$

$E_{\text{SOMO-1},\alpha} = -0.007 \text{ au}, E_{\text{SOMO-1},\beta} = -0.002 \text{ au}$

$E_{\text{SOMO+1},\alpha} = +0.081 \text{ au}, E_{\text{SOMO+1},\beta} = +0.081 \text{ au}$

$\Delta_{\text{min}} = 0.001 \text{ au}$

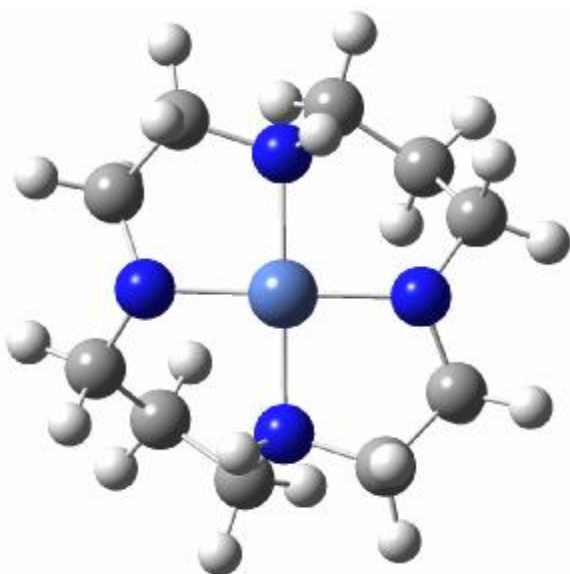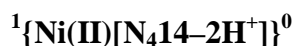

**E = -2121.66280 au**

$\mu_{\text{dip}} = 1.00 \text{ D}$

$R(\text{Ni-N}) = 1.888, 1.890, 1.920, 1.926 \text{ \AA}$

$q(\text{Ni}) = -0.911 \text{ e}$

$q(\text{N}) = +0.038, +0.038, -0.069, -0.072 \text{ e}$

$E_{\text{SOMO},\alpha} = -0.138 \text{ au}$

$E_{\text{SOMO-1},\alpha} = -0.175 \text{ au}$

$E_{\text{SOMO+1},\alpha} = -0.012 \text{ au}$

$\Delta_{\text{min}} = 0.037 \text{ au}$

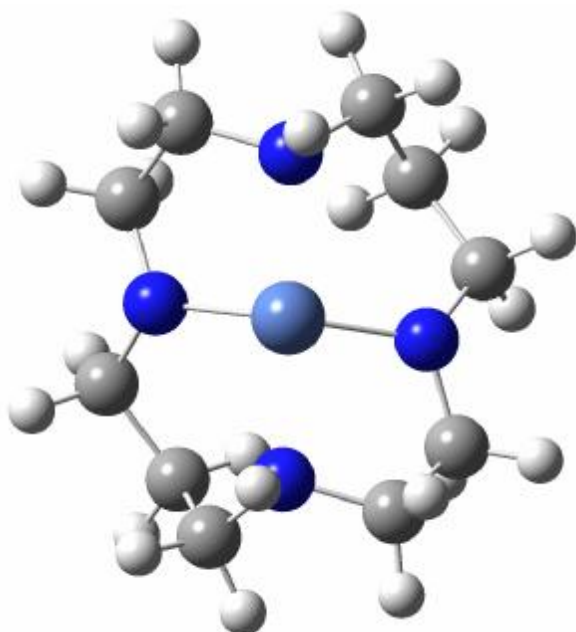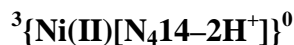

$$E = -2121.66120 \text{ au}$$

$$\mu_{\text{dip}} = 1.54 \text{ D}$$

$$R(\text{Ni-N}) = 1.865, 1.865, 2.127, 2.127 \text{ \AA}$$

$$q(\text{Ni}) = -1.172 \text{ e}$$

$$q(\text{N}) = +0.023, +0.014, +0.092, +0.093 \text{ e}$$

$$E_{\text{SOMO},\alpha} = -0.152 \text{ au}$$

$$E_{\text{SOMO-1},\alpha} = -0.168 \text{ au}, E_{\text{SOMO-1},\beta} = -0.158 \text{ au}$$

$$E_{\text{SOMO+1},\alpha} = -0.016 \text{ au}, E_{\text{SOMO+1},\beta} = -0.020 \text{ au}$$

$$\Delta_{\text{min}} = 0.006 \text{ au}$$

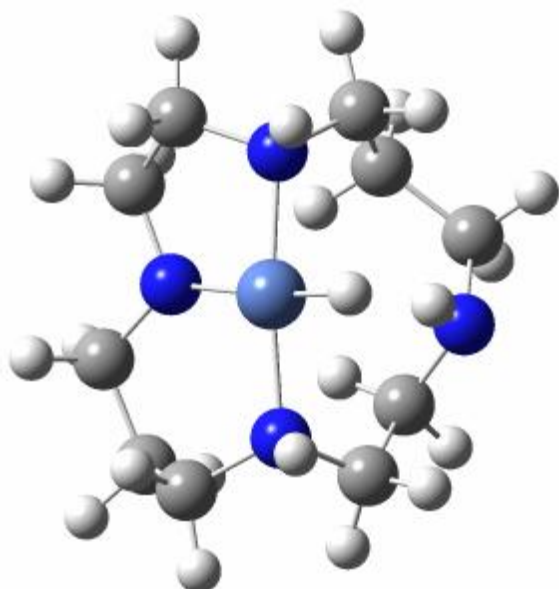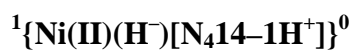

$$E = -2122.83966 \text{ au}$$

$$\mu_{\text{dip}} = 0.53 \text{ D}$$

$$R(\text{Ni-N}) = 1.902, 1.928, 1.942, 2.948 \text{ \AA}$$

$$R(\text{Ni-H}) = 1.509 \text{ \AA}$$

$$q(\text{Ni}) = -1.159 \text{ e}$$

$$q(\text{H}_{\text{Ni}}) = -0.202 \text{ e}$$

$$q(\text{N}) = +0.039, +0.082, +0.090, +0.113 \text{ e}$$

$$E_{\text{SOMO},\alpha} = -0.146 \text{ au}$$

$$E_{\text{SOMO-1},\alpha} = -0.179 \text{ au}$$

$$E_{\text{SOMO+1},\alpha} = -0.018 \text{ au}$$

$$\Delta_{\text{min}} = 0.033 \text{ au}$$

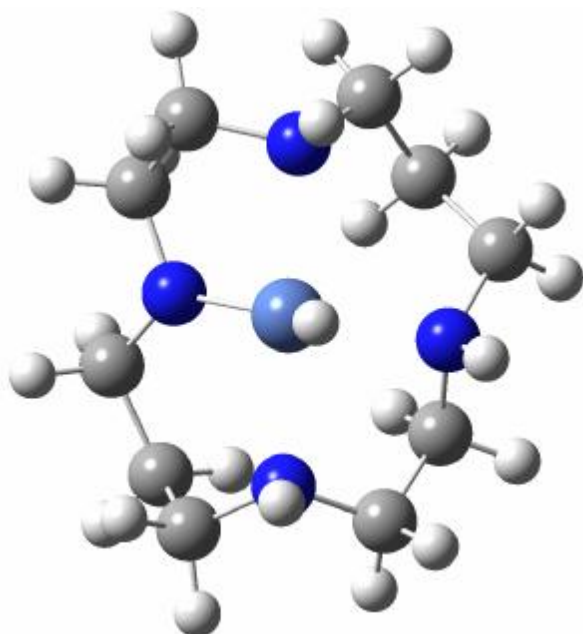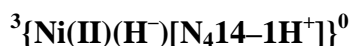

$$E = -2122.84551 \text{ au}$$

$$\mu_{\text{dip}} = 4.39 \text{ D}$$

$$R(\text{Ni-N}) = 1.921, 2.191, 2.200, 2.167 \text{ \AA}$$

$$R(\text{Ni-H}) = 1.625 \text{ \AA}$$

$$q(\text{Ni}) = -0.876 \text{ e}$$

$$q(\text{H}_{\text{Ni}}) = -0.375 \text{ e}$$

$$q(\text{N}) = +0.038, +0.057, +0.067, +0.115 \text{ e}$$

$$E_{\text{SOMO},\alpha} = -0.137 \text{ au}$$

$$E_{\text{SOMO-1},\alpha} = -0.168 \text{ au}, E_{\text{SOMO-1},\beta} = -0.160 \text{ au}$$

$$E_{\text{SOMO+1},\alpha} = -0.018 \text{ au}, E_{\text{SOMO+1},\beta} = -0.018 \text{ au}$$

$$\Delta_{\text{min}} = 0.033 \text{ au}$$

### S3. Calculated molecular properties of compounds of Ni(III).

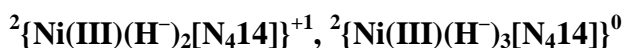

not computed

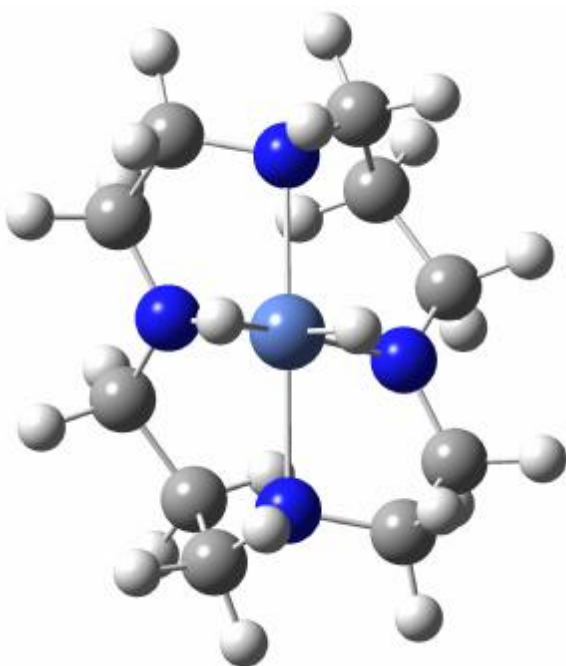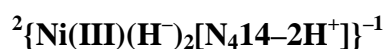

$$E = -2122.82121 \text{ au}$$

$$\mu_{\text{dip}} = 0.40 \text{ D}$$

$$R(\text{Ni-N}) = 1.996, 1.997, 2.222, 2.222 \text{ \AA}$$

$$R(\text{Ni-H}) = 1.498, 1.498 \text{ \AA}$$

$$q(\text{Ni}) = -1.582 \text{ e}$$

$$q(\text{H}_{\text{Ni}}) = -0.033, -0.037 \text{ e}$$

$$q(\text{N}) = +0.075, +0.074, +0.238, +0.240 \text{ e}$$

$$E_{\text{SOMO},\alpha} = -0.004 \text{ au}$$

$$E_{\text{SOMO-1},\alpha} = -0.005 \text{ au}, E_{\text{SOMO-1},\beta} = -0.000 \text{ au}$$

$$E_{\text{SOMO+1},\alpha} = +0.083 \text{ au}, E_{\text{SOMO+1},\beta} = -0.082 \text{ au}$$

$$\Delta_{\text{min}} = 0.001 \text{ au}$$

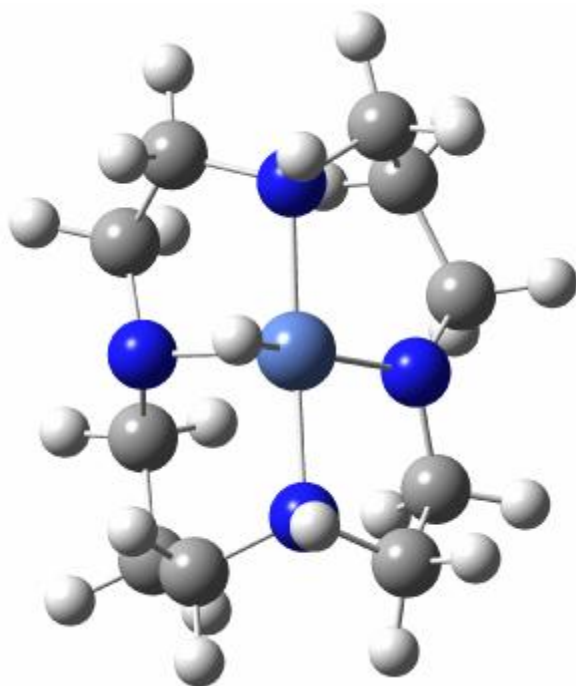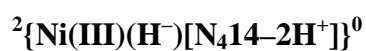

$$E = -2122.20874 \text{ au}$$

$$\mu_{\text{dip}} = 2.13 \text{ D}$$

$$R(\text{Ni-N}) = 1.881, 1.992, 2.002, 2.035 \text{ \AA}$$

$$R(\text{Ni-H}) = 1.481 \text{ \AA}$$

$$q(\text{Ni}) = -1.370 \text{ e}$$

$$q(\text{H}_{\text{Ni}}) = -0.088 \text{ e}$$

$$q(\text{N}) = +0.005, +0.086, +0.089, +0.135 \text{ e}$$

$$E_{\text{SOMO},\alpha} = -0.150 \text{ au}$$

$$E_{\text{SOMO-1},\alpha} = -0.177 \text{ au}, E_{\text{SOMO-1},\beta} = -0.154 \text{ au}$$

$$E_{\text{SOMO+1},\alpha} = -0.051 \text{ au}, E_{\text{SOMO+1},\beta} = -0.044 \text{ au}$$

$$\Delta_{\text{min}} = 0.004 \text{ au}$$

#### S4. Calculated molecular properties of dihydrogen complexes.

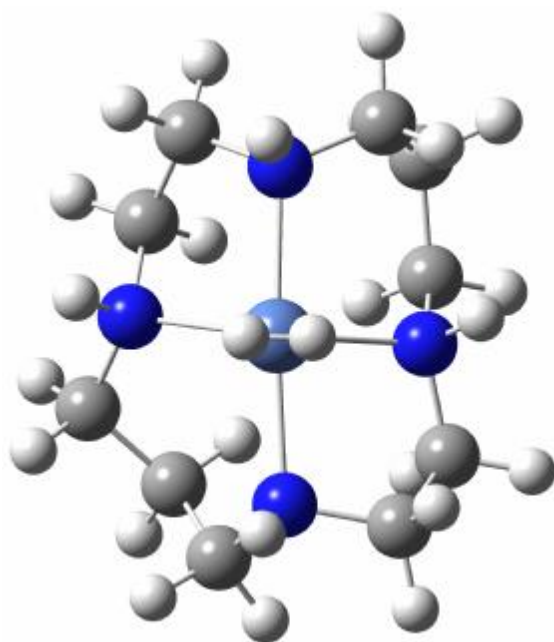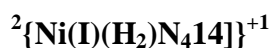

$$E = -2123.88893 \text{ au}$$

$$\mu_{\text{dip}} = 0.35 \text{ D}$$

$$R(\text{Ni-N}) = 2.137, 2.159, 2.160, 2.160 \text{ \AA}$$

$$R(\text{Ni-H}) = 1.645, 1.646 \text{ \AA}$$

$$R(\text{H-H}) = 0.841 \text{ \AA}$$

$$q(\text{Ni}) = -0.336 \text{ e}$$

$$q(\text{H}_{\text{Ni}}) = +0.003, -0.020 \text{ e}$$

$$q(\text{N}) = -0.035, -0.120, -0.169, -0.323 \text{ e}$$

$$E_{\text{SOMO},\alpha} = -0.308$$

$$\text{au}$$

$$E_{\text{SOMO-1},\alpha} = -$$

$$0.319 \text{ au}, E_{\text{SOMO-1},\beta} = -0.292 \text{ au}$$

$$E_{\text{SOMO+1},\alpha} = -0.125 \text{ au}, E_{\text{SOMO+1},\beta} = -0.124 \text{ au}$$

$$\Delta_{\text{min}} = 0.011 \text{ au}$$

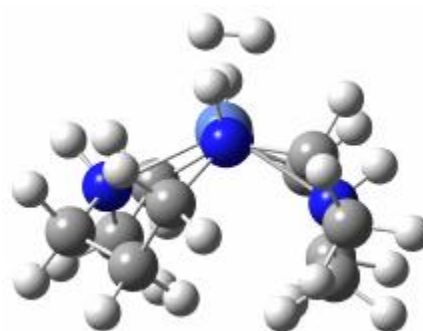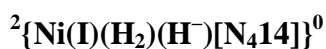

$$E = -2124.59224 \text{ au}$$

$$\mu_{\text{dip}} = 4.52 \text{ D}$$

$$R(\text{Ni-N}) = 2.134, 2.144 \text{ \AA}$$

$$R(\text{Ni-H}) = 1.595, 1.616, 1.642 \text{ \AA}$$

$$R(\text{H-H}) = 0.849 \text{ \AA}$$

$$q(\text{Ni}) = -0.116 \text{ e}$$

$$q(\text{H}_{\text{Ni}}) = -0.070, -0.337 \text{ e}$$

$$q(\text{N}) = +0.007, -0.138, -0.231, -0.357 \text{ e}$$

$$E_{\text{SOMO},\alpha} = -0.146 \text{ au}$$

$$E_{\text{SOMO-1},\alpha} = -0.181 \text{ au},$$

$$E_{\text{SOMO-1},\beta} = -0.154 \text{ au}$$

$$E_{\text{SOMO+1},\alpha} = -0.017 \text{ au}, E_{\text{SOMO+1},\beta} = -0.017 \text{ au}$$

$$\Delta_{\text{min}} = 0.008 \text{ au}$$

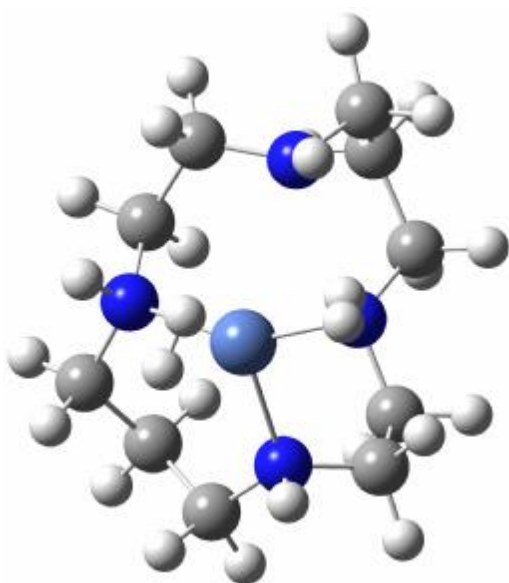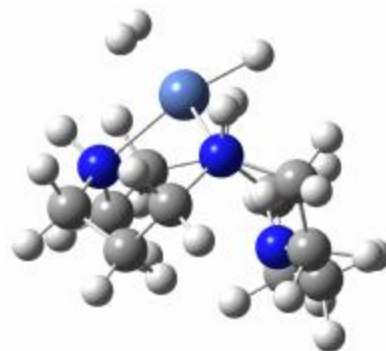

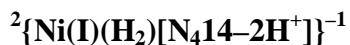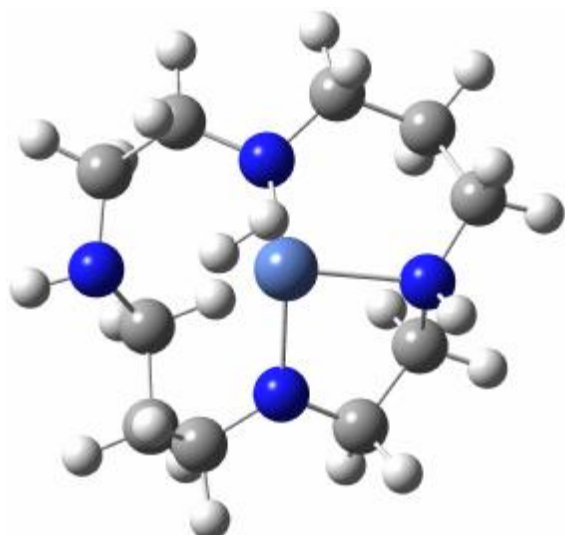

$$E = -2122.82541 \text{ au}$$

$$\mu_{\text{dip}} = 2.73 \text{ D}$$

$$R(\text{Ni-N}) = 1.940, 2.019, 2.170, (3.239) \text{ \AA}$$

$$R(\text{Ni-H}) = 1.567, 1.572 \text{ \AA}$$

$$R(\text{H-H}) = 0.899 \text{ \AA}$$

$$q(\text{Ni}) = -0.446 \text{ e}$$

$$q(\text{H}_{\text{Ni}}) = -0.093, -0.137 \text{ e}$$

$$q(\text{N}) = +0.010, +0.008, -0.021, -0.174 \text{ e}$$

$$E_{\text{SOMO},\alpha} = +0.002 \text{ au}$$

$$E_{\text{SOMO-1},\alpha} = -0.012 \text{ au}, E_{\text{SOMO-1},\beta} = +0.001 \text{ au}$$

$$E_{\text{SOMO+1},\alpha} = +0.080 \text{ au}, E_{\text{SOMO+1},\beta} = +0.080 \text{ au}$$

$$\Delta_{\text{min}} = 0.001 \text{ au}$$

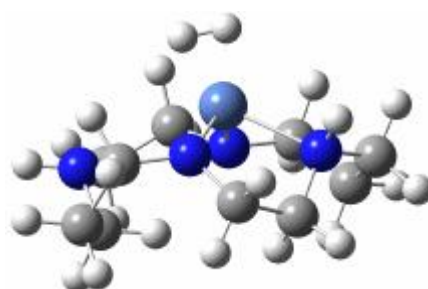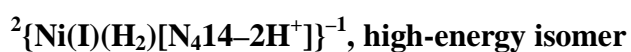

$$E = -2122.81966 \text{ au}$$

$$\mu_{\text{dip}} = 0.74 \text{ D}$$

$$R(\text{Ni-N}) = 2.033, 2.058, 2.210, 2.247 \text{ \AA}$$

$$R(\text{Ni-H}) = 1.607, 1.629 \text{ \AA}$$

$$R(\text{H-H}) = 0.898 \text{ \AA}$$

$$q(\text{Ni}) = -0.322 \text{ e}$$

$$q(\text{H}_{\text{Ni}}) = -0.096, -0.178 \text{ e}$$

$$q(\text{N}) = -0.020, -0.113, -0.126, -0.150 \text{ e}$$

$$E_{\text{SOMO},\alpha} = +0.006 \text{ au}$$

$$E_{\text{SOMO-1},\alpha} = +0.002 \text{ au}, E_{\text{SOMO-1},\beta} = +0.021 \text{ au}$$

$$E_{\text{SOMO+1},\alpha} = +0.082 \text{ au}, E_{\text{SOMO+1},\beta} = +0.082 \text{ au}$$

$$\Delta_{\text{min}} = 0.004 \text{ au}$$

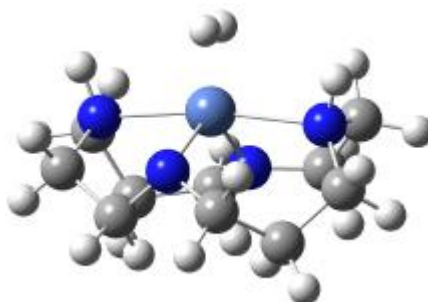

## S5. Calculated molecular properties of hydroxy complexes of Ni(III).

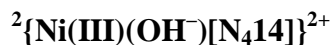

$$E = -2198.21580 \text{ au}$$

$$\mu_{\text{dip}} = 2.65 \text{ D}$$

$$R(\text{Ni-N}) = 1.954, 1.958, 1.995, 2.080 \text{ \AA}$$

$$R(\text{Ni-O}) = 1.806 \text{ \AA}$$

$$R(\text{O-H}) = 0.965 \text{ \AA}$$

$$q(\text{Ni}) = -1.675 \text{ e}$$

$$q(\text{O}) = -0.194 \text{ e}$$

$$q(\text{N}) = +0.019, +0.071, +0.074, +0.206 \text{ e}$$

$$E_{\text{SOMO},\alpha} = -0.531 \text{ au}$$

$$E_{\text{SOMO-1},\alpha} = -0.551 \text{ au},$$

$$E_{\text{SOMO-1},\beta} = -0.542 \text{ au}$$

$$E_{\text{SOMO+1},\alpha} = -0.399 \text{ au}, E_{\text{SOMO+1},\beta} = -0.392 \text{ au}$$

$$\Delta_{\text{min}} = 0.011 \text{ au}$$

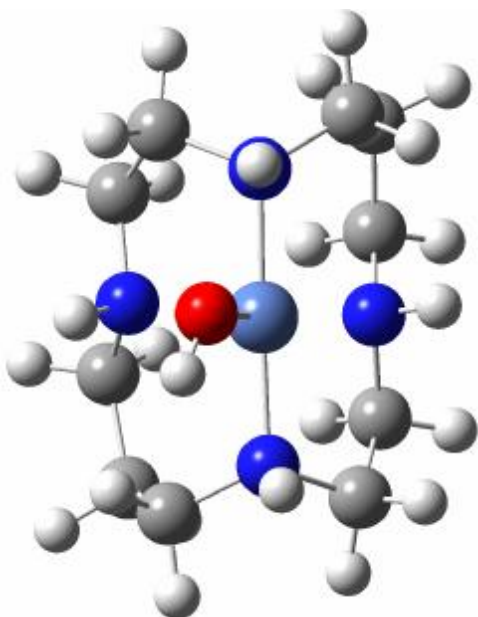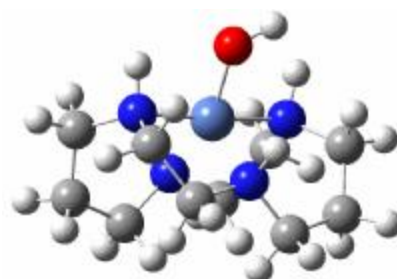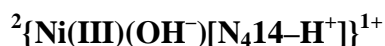

$$E = -2197.92938 \text{ au}$$

$$\mu_{\text{dip}} = 5.04 \text{ D}$$

$$R(\text{Ni-N}) = 1.835, 1.999, 2.009, 2.086 \text{ \AA}$$

$$R(\text{Ni-O}) = 1.845 \text{ \AA}$$

$$R(\text{O-H}) = 0.963 \text{ \AA}$$

$$q(\text{Ni}) = -1.548 \text{ e}$$

$$q(\text{O}) = -0.324 \text{ e}$$

$$q(\text{N}) = +0.023, +0.055, +0.096, +0.285 \text{ e}$$

$$E_{\text{SOMO},\alpha} = -0.331 \text{ au}$$

$$E_{\text{SOMO-1},\alpha} = -0.366 \text{ au},$$

$$E_{\text{SOMO-1},\beta} = -0.329 \text{ au}$$

$$E_{\text{SOMO+1},\alpha} = -0.213 \text{ au}, E_{\text{SOMO+1},\beta} = -0.224 \text{ au}$$

$$\Delta_{\text{min}} = 0.002 \text{ au}$$

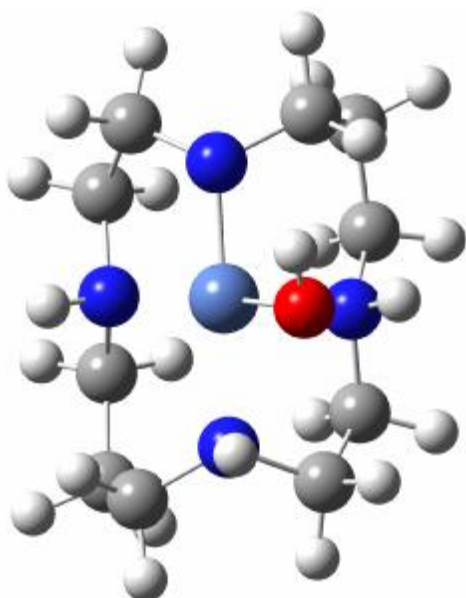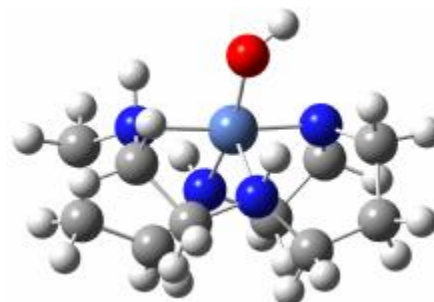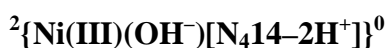

$$E = -2197.47857 \text{ au}$$

$$\mu_{\text{dip}} = 6.54 \text{ D}$$

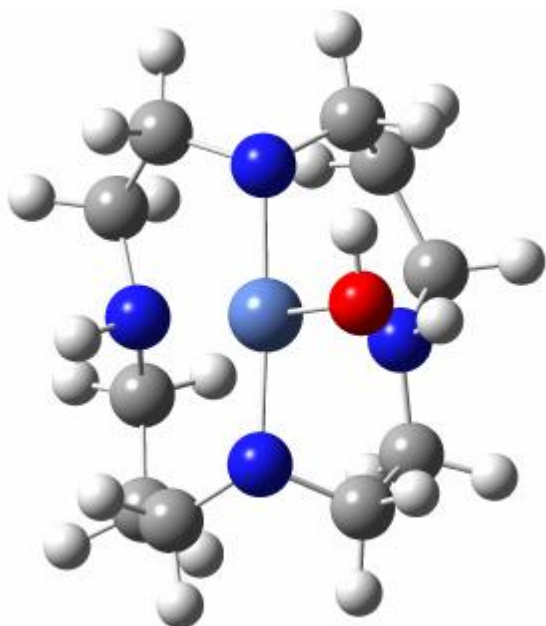

$$R(\text{Ni-N}) = 1.912, 1.918, 2.016, 2.093 \text{ \AA}$$

$$R(\text{Ni-O}) = 1.865 \text{ \AA}$$

$$R(\text{O-H}) = 0.964 \text{ \AA}$$

$$q(\text{Ni}) = -1.187 \text{ e}$$

$$q(\text{O}) = -0.300 \text{ e}$$

$$q(\text{N}) = -0.054, +0.056, +0.065, +0.215 \text{ e}$$

$$E_{\text{SOMO},\alpha} = -0.170 \text{ au}$$

$$E_{\text{SOMO-1},\alpha} = -0.186 \text{ au}, E_{\text{SOMO-1},\beta} = -0.169 \text{ au}$$

$$E_{\text{SOMO+1},\alpha} = -0.164 \text{ au}, E_{\text{SOMO+1},\beta} = -0.072 \text{ au}$$

$$\Delta_{\text{min}} = 0.001 \text{ au}$$

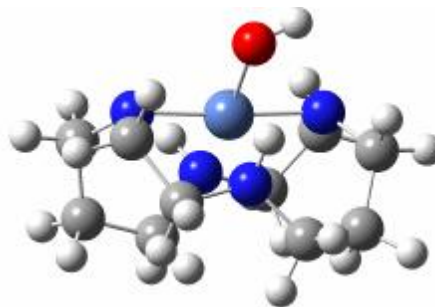

## S6. Calculated molecular properties of $\text{OH}^-$ , $\text{H}_2\text{O}$ , $\text{H}_3\text{O}^+$ , $\text{H}_2$ and $\text{CO}_2$ .

### $^1(\text{OH}^-)$

$$E = -75.82745 \text{ au}$$

$$\mu_{\text{dip}} = 1.74 \text{ D}$$

$$R(\text{O-H}) = 0.966 \text{ \AA}$$

$$q(\text{O}) = -1.114 \text{ e}$$

$$E_{\text{HOMO}} = +0.047 \text{ au}$$

$$E_{\text{LUMO}} = +0.169 \text{ au}$$

$$\Delta_{\text{HL}} = 0.122 \text{ au}$$

### $^1(\text{H}_2\text{O})$

$$E = -76.45853 \text{ au}$$

$$\mu_{\text{dip}} = 2.16 \text{ D}$$

$$R(\text{O-H}) = 0.962 \text{ \AA}$$

$$q(\text{O}) = -0.502 \text{ e}$$

$$E_{\text{HOMO}} = -0.323 \text{ au}$$

$$E_{\text{LUMO}} = -0.023 \text{ au}$$

$$\Delta_{\text{HL}} = 0.300 \text{ au}$$

### $^1(\text{H}_3\text{O}^+)$

$$E = -76.73124 \text{ au}$$

$$\mu_{\text{dip}} = 1.43 \text{ D}$$

$$R(\text{O-H}) = 0.980 \text{ \AA}$$

$$q(\text{O}) = -0.201 \text{ e}$$

$$E_{\text{HOMO}} = -0.745 \text{ au}$$

$$E_{\text{LUMO}} = -0.284 \text{ au}$$

$$\Delta_{\text{HL}} = 0.461 \text{ au}$$

### $^1\text{H}_2$

$$E = -1.17957 \text{ au}$$

$$R(\text{H-H}) = 0.744 \text{ \AA}$$

$$E_{\text{HOMO}} = -0.434 \text{ au}$$

$$E_{\text{LUMO}} = +0.020 \text{ au}$$

$$\Delta_{\text{HL}} = 0.454 \text{ au}$$

### $^1\text{CO}_2$

$$E = -188.64691 \text{ au}$$

$$R(\text{C-O}) = 1.161 \text{ \AA}$$

$$E_{\text{HOMO}} = -0.356 \text{ au}$$

$$E_{\text{LUMO}} = -0.020 \text{ au}$$

$$\Delta_{\text{HL}} = 0.336 \text{ au}$$

## S7. Transformations of various hydroxy- complexes of Ni(I) at different deprotonation stages.

Schematic representation of H<sub>2</sub> elimination reactions involving tetraazamacrocyclic complexes of Ni(I) at various pH. Calculated enthalpies of reactions are shown.

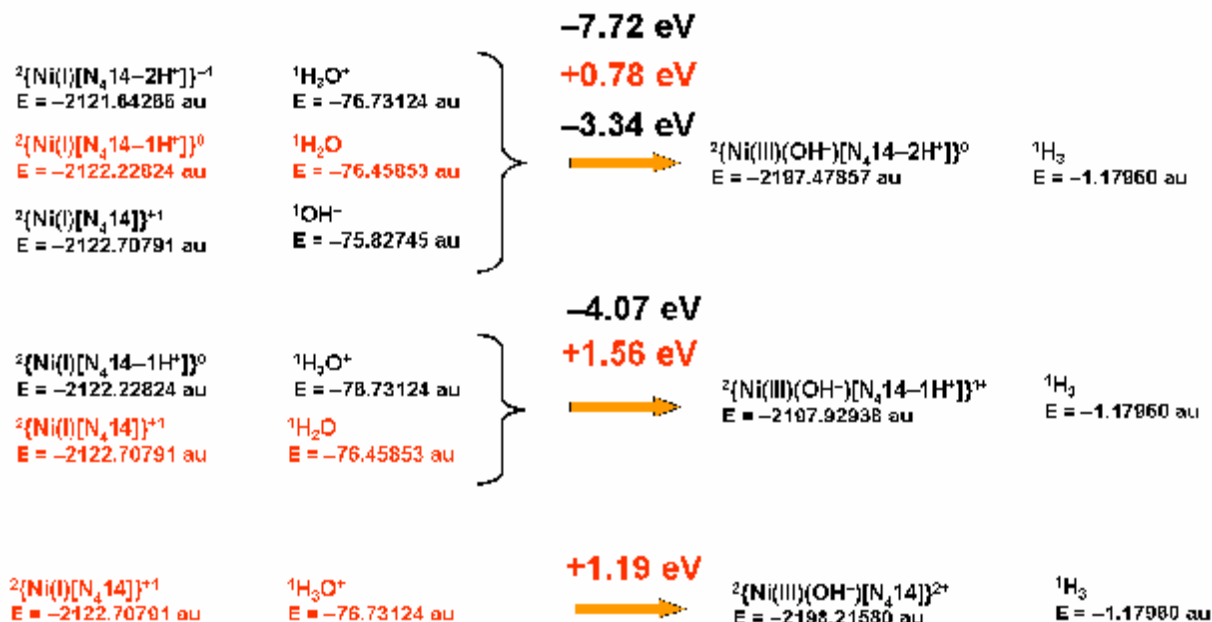

Due to large differences between acidity and basicity of species considered here, the process described by Eq.(7a) in the paper is calculated to be extremely sensitive to pH. For example, the calculated enthalpies of reactions:

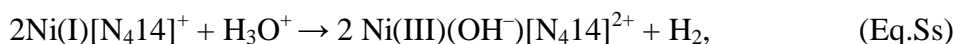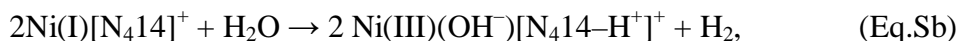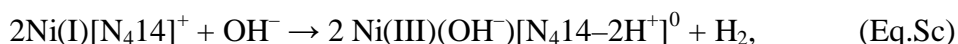

range in an extremely broad span, from +1.19 eV via +1.56 eV to -3.34 eV, respectively.

Ni(I)-catalyzed process of H<sub>2</sub> evolution is calculated to be thermodynamically viable for complexes at various deprotonation stages of the amino hydrogens; among these, reaction intermediate between (Sc) and between the process:

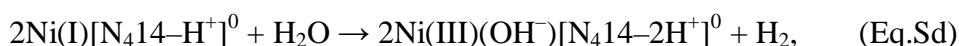

seems to be the most rational choice (while analyzing graph above recollect that simultaneous presence of deprotonated complex and hydronium cations is unlikely in the same reaction medium). Such ‘intermediate process’ might be realized for a hydrated complex deprotonated at one amine N, which shows the (OH<sub>2</sub>...N<sup>-</sup>) hydrogen bond interaction.

Studies of involvement of aquacomplexes in these reaction (for example:

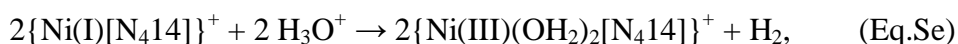

and those taking into account the trans/cis isomerism of cyclam complexes are also natural extensions of present work, and they are under scrutiny in our laboratory.
